# Supplementary material for: Intra and Interspecific Variations of Gene Expression Levels in Yeast Are Largely Neutral: (Nei Lecture, SMBE 2016, Gold Coast)
Source: PubMed Central journal article supplement — Mol Biol Evol. 2017 May 29;34(9):2125–39. doi: 10.1093/molbev/msx171 (PMC5850415; doi:10.1093/molbev/msx171), 2017-05-29
Supplement: msx171_suppl.pdf [file msx171_suppl.pdf]

**Supplementary materials for**

**Intra- and inter-specific variations of gene expression levels in yeast are largely neutral**

Yang, Maclean, Park, Zhao, and Zhang (jianzhi@umich.edu)

Supplementary materials include:

Legends for supplementary figures

Figures S1-S3

Table S1

## LEGENDS OF SUPPLEMENTARY FIGURES

**Figure S1.** High correlation ( $R$ ) between the gene expression levels of strain YPS606 measured in two biological replicates. Each dot is a gene. RPKM, reads per kilobases per million reads.

**Figure S2.** Transcriptome trees showing no clustering of wild strains. Panels (A)-(B) are equivalent to Fig. 1A, except that TPM instead of RPKM is used to measure gene expression levels (A), or expression level is quantile-normalized across samples (B). Panels (C)-(E) are equivalent to Fig. 1B-D, respectively, except that the data from the two biological replicates of YPS606 are not merged. Panel (F) is similar to the GO-based analysis in Fig. 1G, except that here we respectively perform biochemical pathway-based (“Biochemistry”) and gene deletion phenotype-based (“Phenotype”) analyses.

**Figure S3.** Principal component analysis of gene expression levels of the nine strains. (A-B) Same as Fig. 2B, except that the (A) 75% or (B) 50% most highly expressed genes instead of all genes are used. (C) Frequency distribution (bars) of the mean distance between two *S. cerevisiae* strains ( $d_{Sc-Sc}$ ) divided by the mean distance between a *S. cerevisiae* strain and a *S. paradoxus* strain ( $d_{Sc-Sp}$ ) in the transcriptome PCA plot made with 1000 random sets of 219 genes. The arrow shows the corresponding ratio in the morphology PCA plot with 219 traits.

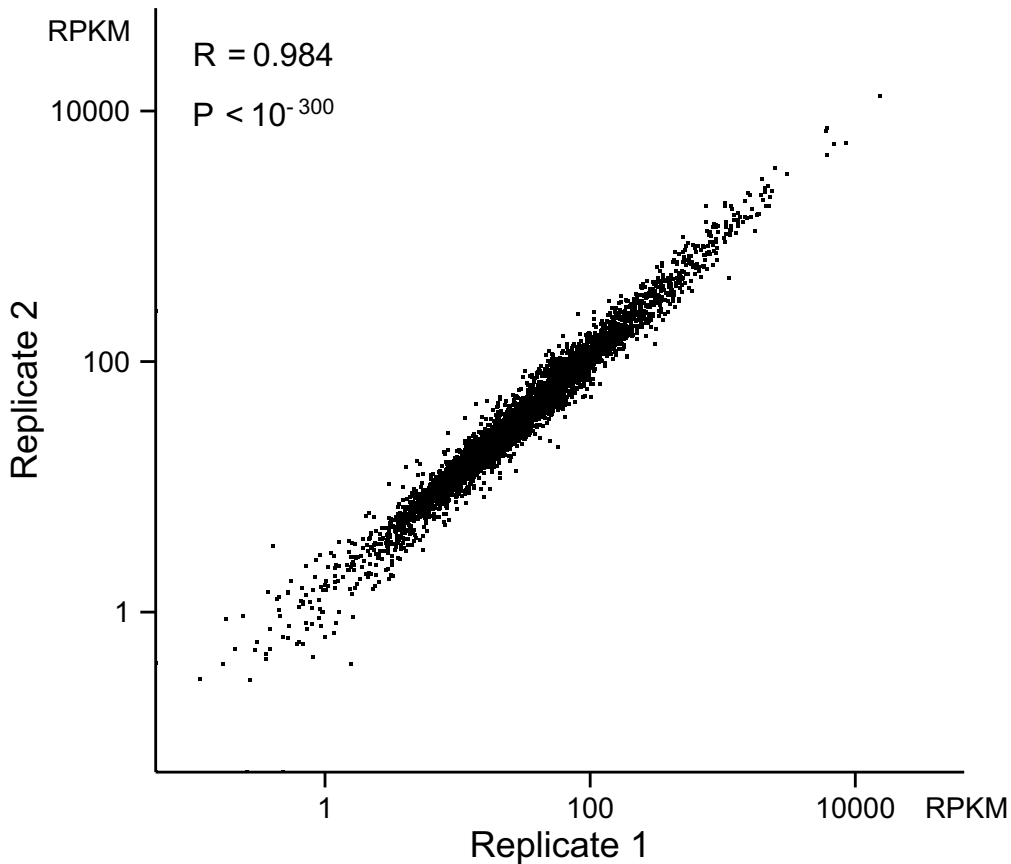

**Figure S1**

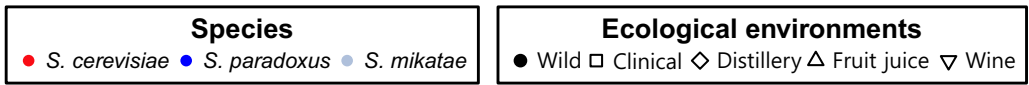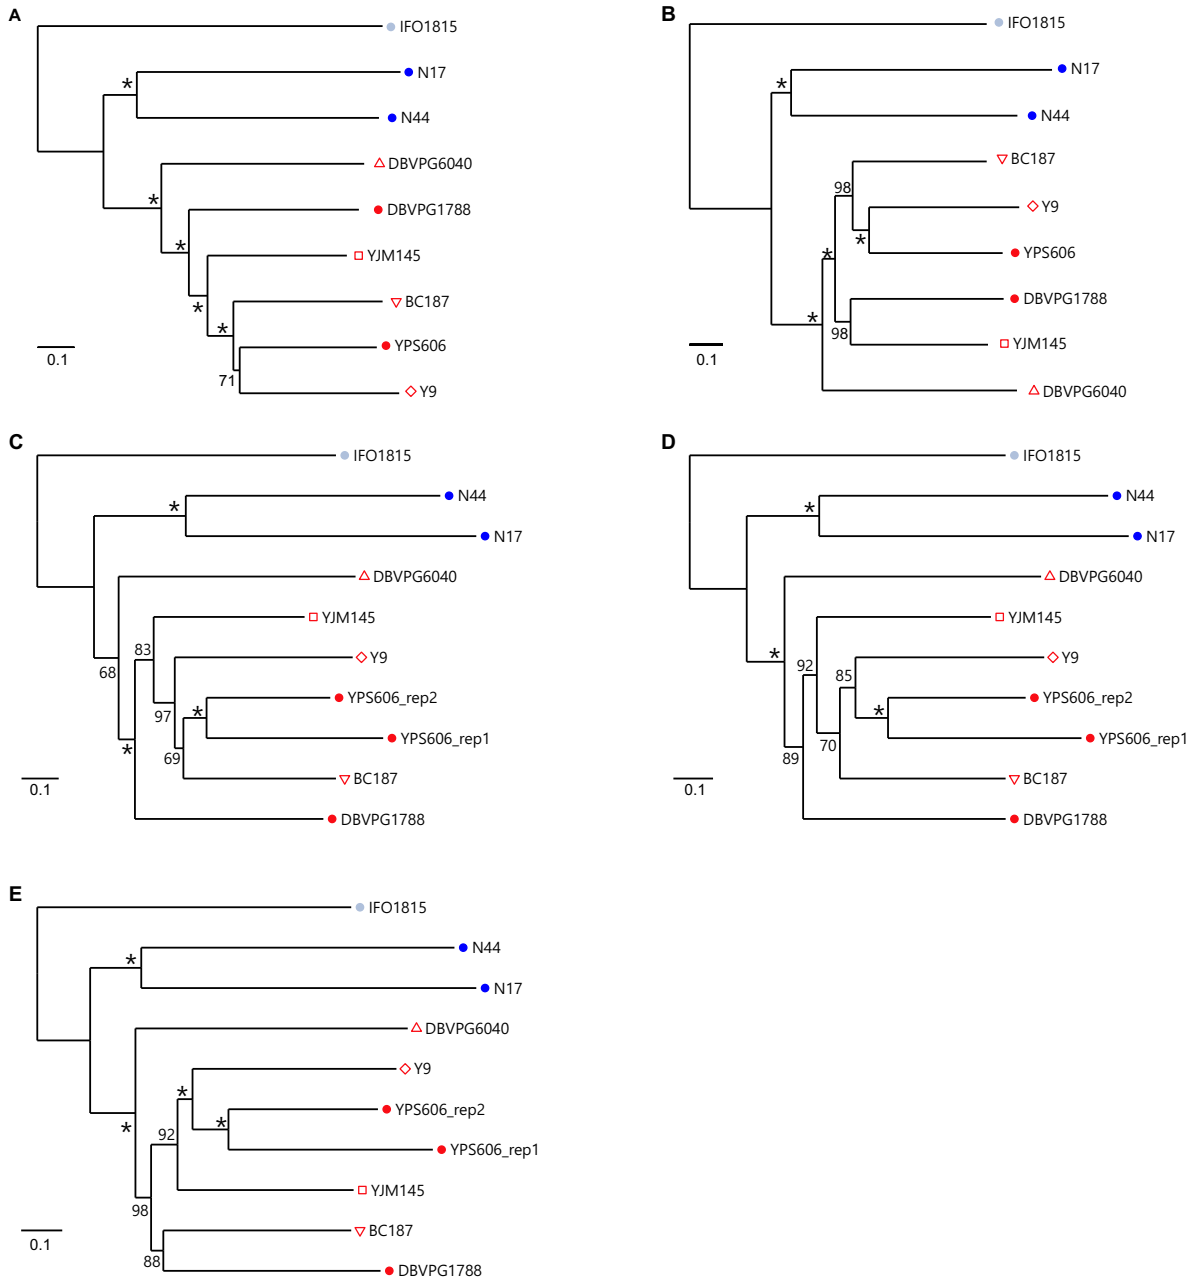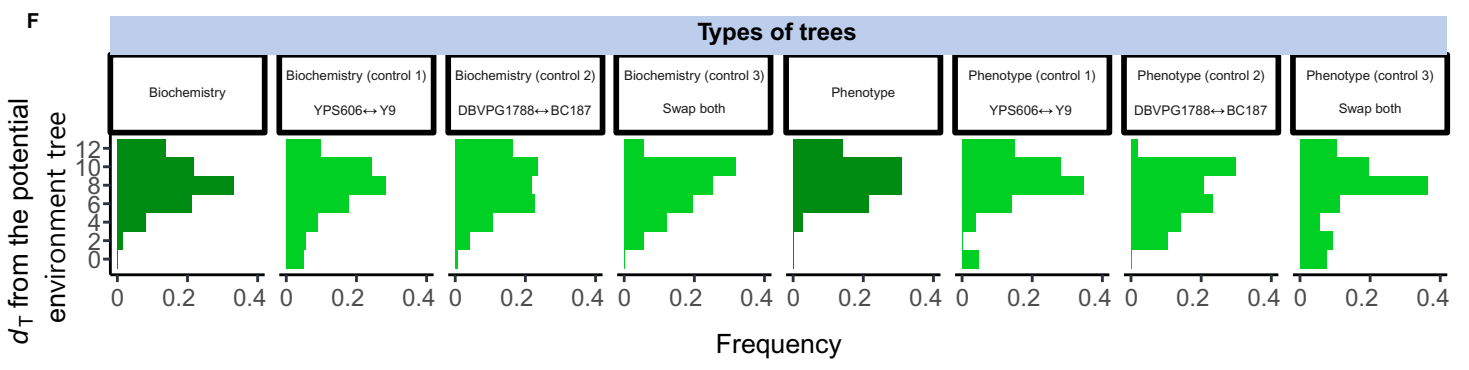

Figure S2

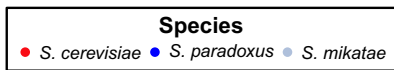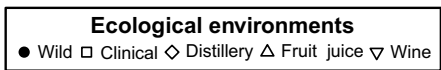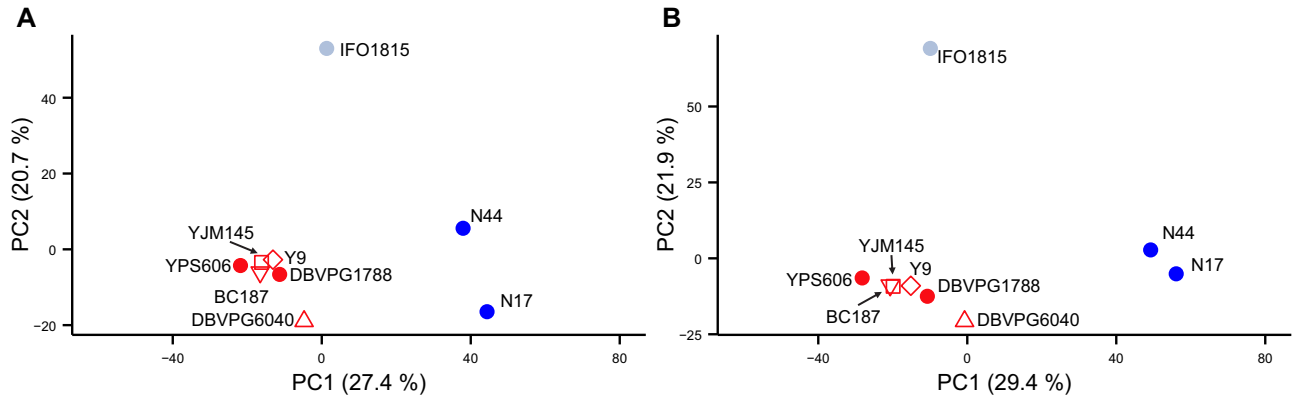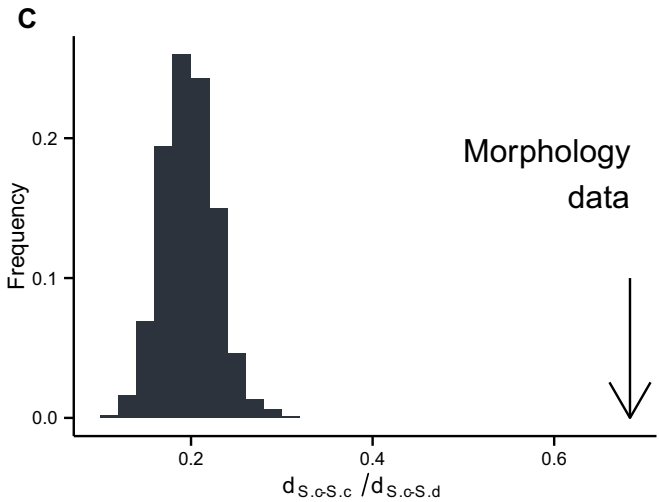

**Figure S3**

Table S1. Yeast strains used in this study and their RNA-seq statistics

| Strain name | Species              | Location isolated    | Source                               | Ecological environment | RNA-seq replicates | Total no. of reads | Total no. of mapped reads | % reads mapped |
|-------------|----------------------|----------------------|--------------------------------------|------------------------|--------------------|--------------------|---------------------------|----------------|
| IFO1815     | <i>S. mikatae</i>    | Japan                | Soil and decayed leaf <sup>1</sup>   | Wild                   | -                  | 66,240,801         | 64,638,113                | 97.6           |
| N17         | <i>S. paradoxus</i>  | Tartastan, Russia    | Oak tree <sup>2</sup>                | Wild                   | -                  | 115,346,915        | 105,734,882               | 91.7           |
| N44         | <i>S. paradoxus</i>  | Ternei, Russia       | Oak tree <sup>2</sup>                | Wild                   | -                  | 65,760,339         | 61,681,466                | 93.8           |
| YPS606      | <i>S. cerevisiae</i> | Woodland, PA, USA    | Oak tree <sup>2</sup>                | Wild                   | #1                 | 92,306,996         | 84,425,699                | 91.5           |
|             |                      |                      |                                      |                        | #2                 | 72,024,415         | 68,728,390                | 95.4           |
| DBVPG1788   | <i>S. cerevisiae</i> | Turku, Finland       | Soil <sup>2</sup>                    | Wild                   | -                  | 66,775,841         | 64,425,230                | 96.5           |
| DBVPG6040   | <i>S. cerevisiae</i> | Netherlands          | Fermenting fruit juice <sup>2</sup>  | Fruit juice            | -                  | 61,119,979         | 58,403,789                | 95.6           |
| Y9          | <i>S. cerevisiae</i> | Indonesia            | Ragi (similar to sake) <sup>2</sup>  | Distillery             | -                  | 60,281,732         | 57,939,014                | 96.1           |
| BC187       | <i>S. cerevisiae</i> | Napa Valley, CA, USA | Barrel fermentation <sup>2</sup>     | Wine                   | -                  | 74,811,125         | 72,340,238                | 96.7           |
| YJM145      | <i>S. cerevisiae</i> | USA                  | Lung of an AIDS patient <sup>3</sup> | Clinical               | -                  | 69,619,794         | 65,883,520                | 94.6           |

<sup>1</sup> Liti, G., A. Peruffo, S. A. James, I. N. Roberts, and E. J. Louis. (2005) Inferences of evolutionary relationships from a population survey of LTR-retrotransposons and telomeric-associated sequences in the *Saccharomyces sensu stricto* complex. *Yeast* 22: 177–92. doi:10.1002/yea.1200.

<sup>2</sup> Liti, G., D. M. Carter, A. M. Moses, J. Warringer, L. Parts, S. A. James, R. P. Davey, *et al.* (2009) Population genomics of domestic and wild yeasts. *Nature* 458: 337–341. doi:10.1038/nature07743.

<sup>3</sup> Nakayashiki, T., C. P. Kurtzman, H. K. Edskes, and R. B. Wickner. (2005) Yeast prions [URE3] and [PSI+] are diseases. *Proc. Natl. Acad. Sci. USA* 102: 10575–10580. doi:10.1073/pnas.0504882102.
